# Supplementary material for: Emerging Phage Resistance in Pseudomonas aeruginosa PAO1 Is Accompanied by an Enhanced Heterogeneity and Reduced Virulence
Source: Viruses. 2021 Jul 10;13(7):1332. doi: 10.3390/v13071332 (PMC8310095; doi:10.3390/v13071332)
Supplement: Supplementary file 1 [file viruses-13-01332-s001.zip › Table S1 phage typing Viruses.xlsx]

## Sheet: Summary
Clones isolated after phage treatment	Phage untreated culture	LUZ7	KTN6 or KT28	ΦKZ or KTN4	LUZ19	2 phage cocktails	3 phage cocktails	Total
Number of biofilm clones	30	40	60	59	33	110	85	417
Typing patterns	1	10	7	8	4	17	14
		25	11.6667	13.5593		12.1212	15.4545

## Sheet: Phage untreated culture
	Phage susceptibility patterns						+	susceptibility to phage
Name	LUZ7	KTN6/KT28	LUZ19	ΦKZ/KTN4	PA5oct		-	resistance to phage
Starting strain
PAO1	+	+	+	+	+
Phage untreated culture
PAO1-K-24-A	+	+	+	+	+
PAO1-K-24-B	+	+	+	+	+
PAO1-K-24-C	+	+	+	+	+
PAO1-K-24-D	+	+	+	+	+
PAO1-K-24-E	+	+	+	+	+
PAO1-K-24-F	+	+	+	+	+
PAO1-K-24-G	+	+	+	+	+
PAO1-K-24-H	+	+	+	+	+
PAO1-K-24-I	+	+	+	+	+
PAO1-K-24-J	+	+	+	+	+
PAO1-K-48-A	+	+	+	+	+
PAO1-K-48-B	+	+	+	+	+
PAO1-K-48-C	+	+	+	+	+
PAO1-K-48-D	+	+	+	+	+
PAO1-K-48-E	+	+	+	+	+
PAO1-K-48-F	+	+	+	+	+
PAO1-K-48-G	+	+	+	+	+
PAO1-K-48-H	+	+	+	+	+
PAO1-K-48-I	+	+	+	+	+
PAO1-K-48-J	+	+	+	+	+
PAO1-K-72-A	+	+	+	+	+
PAO1-K-72-B	+	+	+	+	+
PAO1-K-72-C	+	+	+	+	+
PAO1-K-72-D	+	+	+	+	+
PAO1-K-72-E	+	+	+	+	+
PAO1-K-72-F	+	+	+	+	+
PAO1-K-72-G	+	+	+	+	+
PAO1-K-72-H	+	+	+	+	+
PAO1-K-72-I	+	+	+	+	+
PAO1-K-72-J	+	+	+	+	+

## Sheet: Treated with phage LUZ7
	Phage susceptibility patterns						+	susceptibility to phage
Name	LUZ7	KTN6/KT28	LUZ19	ΦKZ/KTN4	PA5oct		-	resistance to phage
PAO1-LUZ7-48-D	+	+	+	+	+
PAO1-LUZ7-48-I	+	+	+	+	+
PAO1-LUZ7-48-G	+	+	+	+	+
PAO1-LUZ7-24-K	+	+	+	+	+
PAO1-LUZ7-48-C	+	+	+	+	+
PAO1-LUZ7-48-E	+	+	+	+	+
PAO1-LUZ7-24-A	+	+	+	+	+
PAO1-LUZ7-48-A	+	+	+	+	+
PAO1-LUZ7-72-B	+	+	+	+	+
PAO1-LUZ7-48-B	-	+	+	+	+
PAO1-LUZ7-72-J	-	+	+	+	+
PAO1-LUZ7-72-F	-	+	+	+	+
PAO1-LUZ7-24-G	+	+	-	+	+
PAO1-LUZ7-72-N	-	+	-	+	+
PAO1-LUZ7-72-I	-	+	-	+	+
PAO1-LUZ7-72-R	-	+	+	+	+
PAO1-LUZ7-72-D	-	+	-	+	-
PAO1-LUZ7-24-L	+	+	-	-	-
PAO1-LUZ7-24-C	-	+	+	-	-
PAO1-LUZ7-24-E	-	+	+	-	-
PAO1-LUZ7-24-H	-	+	+	-	-
PAO1-LUZ7-24-I	-	+	+	-	-
PAO1-LUZ7-24-D	-	+	+	-	-
PAO1-LUZ7-48-M	-	+	+	-	-
PAO1-LUZ7-72-E	-	+	-	-	-
PAO1-LUZ7-24-J	-	+	-	-	-
PAO1-LUZ7-24-F	-	+	-	-	-
PAO1-LUZ7-48-F	-	+	-	-	-
PAO1-LUZ7-48-H	-	+	-	-	-
PAO1-LUZ7-72-P	-	+	-	-	-
PAO1-LUZ7-72-M	-	+	-	-	-
PAO1-LUZ7-72-C	-	+	-	-	-
PAO1-LUZ7-72-G	-	+	-	-	-
PAO1-LUZ7-72-K	-	-	-	-	-
PAO1-LUZ7-72-H	-	-	-	-	-
PAO1-LUZ7-24-B	-	-	-	-	-
PAO1-LUZ7-72-L	-	-	-	-	-
PAO1-LUZ7-48-K	-	-	-	-	-
PAO1-LUZ7-48-L	-	-	-	-	-
PAO1-LUZ7-72-O	-	-	-	-	-

## Sheet: Treated with phage KTN6 or KT28
	Phage susceptibility patterns						+	susceptibility to phage
Name	LUZ7	KTN6/KT28	LUZ19	ΦKZ/KTN4	PA5oct		-	resistance to phage
PAO1-KTN6-72-A	+	+	+	+	+
PAO1-KT28-72-G	+	+	+	+	+
PAO1-KTN6-72-C	+	+	+	+	+
PAO1-KTN6-72-H	+	+	+	+	+
PAO1-KTN6-72-F	+	+	+	+	+
PAO1-KTN6-48-H	+	+	+	+	+
PAO1-KTN6-24-F	+	+	+	+	+
PAO1-KTN6-24-G	+	+	+	+	+
PAO1-KTN6-24-H	+	+	+	+	+
PAO1-KTN6-24-A	+	+	+	+	+
PAO1-KTN6-48-C	+	+	+	+	+
PAO1-KTN6-48-D	+	+	+	+	+
PAO1-KTN6-24-E	+	+	+	+	+
PAO1-KTN6-48-F	+	+	+	+	+
PAO1-KTN6-24-J	+	+	+	+	+
PAO1-KTN6-24-I	+	+	+	+	+
PAO1-KT28-72-J	+	+	+	+	+
PAO1-KT28-72-F	+	+	+	+	+
PAO1-KT28-48-E	+	+	+	+	+
PAO1-KT28-48-F	+	+	+	+	+
PAO1-KT28-48-C	+	+	+	+	+
PAO1-KT28-24-I	+	+	+	+	+
PAO1-KT28-72-D	+	+	+	+	+
PAO1-KT28-48-I	+	+	+	+	+
PAO1-KT28-24-G	+	+	+	+	+
PAO1-KT28-24-H	+	+	+	+	+
PAO1-KT28-24-A	+	+	+	+	+
PAO1-KT28-24-C	+	+	+	+	+
PAO1-KT28-24-D	+	+	+	+	+
PAO1-KT28-24-E	+	+	+	+	+
PAO1-KT28-48-H	+	+	+	+	+
PAO1-KT28-24-J	+	+	+	+	+
PAO1-KTN6-24-D	+	-	+	+	+
PAO1-KTN6-48-B	+	-	+	+	+
PAO1-KTN6-48-E	+	-	+	+	+
PAO1-KTN6-48-G	+	-	+	+	+
PAO1-KTN6-24-B	+	-	+	+	+
PAO1-KTN6-24-C	+	-	+	+	+
PAO1-KT28-24-B	+	-	+	+	+
PAO1-KT28-72-C	+	-	+	+	+
PAO1-KT28-48-B	+	-	+	+	+
PAO1-KT28-48-G	+	-	+	+	+
PAO1-KT28-24-F	+	-	+	+	+
PAO1-KT28-72-A	+	-	+	+	+
PAO1-KT28-48-D	+	-	+	+	+
PAO1-KTN6-48-I	+	+	+	+	-
PAO1-KTN6-48-J	+	+	+	+	-
PAO1-KTN6-72-D	+	-	+	+	-
PAO1-KTN6-72-G	+	-	+	+	-
PAO1-KTN6-72-I	+	-	+	+	-
PAO1-KTN6-48-A	+	-	+	+	-
PAO1-KT28-48-J	+	-	+	+	-
PAO1-KT28-72-I	+	-	+	+	-
PAO1-KT28-72-B	+	-	+	+	-
PAO1-KT28-48-A	+	-	+	+	-
PAO1-KT28-72-E	-	-	+	+	+
PAO1-KT28-72-H	-	-	+	+	+
PAO1-KTN6-72-B	-	-	+	+	+
PAO1-KTN6-72-E	+	-	+	-	-
PAO1-KTN6-72-J	-	-	+	+	-

## Sheet: Treated with phage LUZ19
	Phage susceptibility patterns						+	susceptibility to phage
Name	LUZ7	KTN6/KT28	LUZ19	phiKZ/KTN4	PA5oct		-	resistance to phage
PAO1-LUZ19-48-I	+	+	+	+	+
PAO1-LUZ19-72-A	+	+	+	+	+
PAO1-LUZ19-72-B	+	+	+	+	+
PAO1-LUZ19-72-C	+	+	+	+	+
PAO1-LUZ19-72-D	+	+	+	+	+
PAO1-LUZ19-72-E	+	+	+	+	+
PAO1-LUZ19-72-F	+	+	+	+	+
PAO1-LUZ19-72-G	+	+	+	+	+
PAO1-LUZ19-72-H	+	+	+	+	+
PAO1-LUZ19-72-I	+	+	+	+	+
PAO1-LUZ19-72-J	+	+	+	+	+
PAO1-LUZ19-48-D	+	+	+	+	+
PAO1-LUZ19-48-C	+	+	+	+	+
PAO1-LUZ19-48-J	+	+	+	+	+
PAO1-LUZ19-24-E	+	+	-	+	+
PAO1-LUZ19-24-I	+	+	-	+	+
PAO1-LUZ19-48-A	+	+	-	+	+
PAO1-LUZ19-48-H	+	+	-	+	+
PAO1-LUZ19-24-B	+	+	-	+	+
PAO1-LUZ19-24-G	+	+	-	+	+
PAO1-LUZ19-24-H	+	+	-	+	+
PAO1-LUZ19-48-M	+	+	-	+	+
PAO1-LUZ19-24-C	+	+	-	+	+
PAO1-LUZ19-24-D	+	+	-	+	+
PAO1-LUZ19-48-L	+	+	-	+	-
PAO1-LUZ19-24-F	+	+	-	+	-
PAO1-LUZ19-24-A	+	+	-	+	-
PAO1-LUZ19-48-B	+	+	-	+	-
PAO1-LUZ19-48-E	+	+	-	+	-
PAO1-LUZ19-48-K	+	+	-	+	-
PAO1-LUZ19-24-J	+	+	-	+	-
PAO1-LUZ19-48-G	+	+	-	+	-
PAO1-LUZ19-48-F	+	+	+	+	-

## Sheet: Treated with phage ΦKZ or KTN4
	Phage susceptibility patterns						+	susceptibility to phage
Name	LUZ7	KTN6/KT28	LUZ19	phiKZ/KTN4	PA5oct		-	resistance to phage
PAO1-phiKZ-24-C	+	+	+	+	+
PAO1-phiKZ-24-F	+	+	+	+	+
PAO1-phiKZ-24-G	+	+	+	+	+
PAO1-phiKZ-48-B	+	+	+	+	+
PAO1-phiKZ-72-B	+	+	+	+	+
PAO1-phiKZ-72-D	+	+	+	+	+
PAO1-phiKZ-24-J	+	+	+	+	+
PAO1-phiKZ-48-D	+	+	+	+	+
PAO1-KTN4-24-A	+	+	+	+	+
PAO1-KTN4-24-I	+	+	+	+	+
PAO1-KTN4-48-A	+	+	+	+	+
PAO1-KTN4-48-C	+	+	+	+	+
PAO1-KTN4-48-G	+	+	+	+	+
PAO1-KTN4-48-I	+	+	+	+	+
PAO1-KTN4-48-J	+	+	+	+	+
PAO1-phiKZ-24-B	+	+	-	+	+
PAO1-KTN4-72-F	+	+	+	-	+
PAO1-phiKZ-24-D	+	+	+	-	+
PAO1-KTN4-24-F	+	+	+	+	-
PAO1-phiKZ-72-E	+	+	-	+	-
PAO1-phiKZ-48-I	+	+	-	+	-
PAO1-phiKZ-48-C	+	+	+	-	-
PAO1-phiKZ-48-G	+	+	+	-	-
PAO1-phiKZ-48-H	+	+	+	-	-
PAO1-phiKZ-48-E	+	+	+	-	-
PAO1-phiKZ-72-I	+	+	+	-	-
PAO1-phiKZ-24-H	+	+	+	-	-
PAO1-phiKZ-48-F	+	+	+	-	-
PAO1-phiKZ-48-J	+	+	+	-	-
PAO1-phiKZ-72-J	+	+	+	-	-
PAO1-phiKZ-72-H	+	+	+	-	-
PAO1-phiKZ-48-A	+	+	+	-	-
PAO1-phiKZ-72-A	+	+	+	-	-
PAO1-KTN4-24-D	+	+	+	-	-
PAO1-KTN4-24-B	+	+	+	-	-
PAO1-KTN4-24-H	+	+	+	-	-
PAO1-KTN4-24-J	+	+	+	-	-
PAO1-KTN4-48-B	+	+	+	-	-
PAO1-KTN4-48-D	+	+	+	-	-
PAO1-KTN4-48-F	+	+	+	-	-
PAO1-KTN4-72-B	+	+	+	-	-
PAO1-KTN4-72-H	+	+	+	-	-
PAO1-KTN4-72-D	+	+	+	-	-
PAO1-KTN4-48-H	+	+	+	-	-
PAO1-KTN4-48-E	+	+	+	-	-
PAO1-phiKZ-24-I	+	+	-	-	-
PAO1-phiKZ-24-E	+	+	-	-	-
PAO1-phiKZ-24-A	+	+	-	-	-
PAO1-phiKZ-72-F	+	+	-	-	-
PAO1-phiKZ-72-G	+	+	-	-	-
PAO1-KTN4-24-G	+	+	-	-	-
PAO1-KTN4-24-C	+	+	-	-	-
PAO1-KTN4-24-E	+	+	-	-	-
PAO1-KTN4-72-G	+	+	-	-	-
PAO1-KTN4-72-I	+	+	-	-	-
PAO1-KTN4-72-J	+	+	-	-	-
PAO1-KTN4-72-C	+	+	-	-	-
PAO1-KTN4-72-A	+	+	-	-	-
PAO1-phiKZ-72-C	-	-	+	-	-

## Sheet: Treated with 2 phage cocktails
	Phage susceptibility patterns						+	susceptibility to phage
Name	LUZ7	KTN6/KT28	LUZ19	phiKZ/KTN4	PA5oct		-	resistance to phage
PAO1-KTN6-LUZ7-24-A	+	+	+	+	+
PAO1-KTN6-LUZ7-72-A	+	+	+	+	+
PAO1-KTN6-phiKZ-48-F	+	+	+	+	+
PAO1-KTN6-KTN4-48-G	+	+	+	+	+
PAO1-KTN6-KTN4-72-J	+	+	+	+	+
PAO1-KTN6-KTN4-24-K	+	+	+	+	+
PAO1-KTN6-KTN4-24-F	+	+	+	+	+
PAO1-KTN6-LUZ7-48-J	+	-	+	+	+
PAO1-KTN6-LUZ7-72-I	+	-	+	+	+
PAO1-KTN6-phiKZ-48-E	+	-	+	+	+
PAO1-KTN6-phiKZ-48-K	+	-	+	+	+
PAO1-KTN6-phiKZ-72-A	+	-	+	+	+
PAO1-KTN6-KTN4-48-H	+	-	+	+	+
PAO1-KTN6-KTN4-24-A	+	-	+	+	+
PAO1-KTN6-KTN4-48-B	+	-	+	+	+
PAO1-KTN6-KTN4-24-J	+	-	+	+	+
PAO1-KTN6-KTN4-72-K	+	-	+	+	+
PAO1-KTN6-KTN4-72-M	+	-	+	+	+
PAO1-KTN6-KTN4-72-N	+	+	-	+	+
PAO1-KT28-phiKZ-72-E	-	-	+	+	+
PAO1-KTN6-LUZ7-48-H	-	-	+	+	+
PAO1-LUZ7-KTN4-72-A	-	+	-	-	+
PAO1-KTN6-phiKZ-24-A	+	-	+	-	+
PAO1-KTN6-phiKZ-24-F	+	+	-	-	+
PAO1-KT28-phiKZ-72-G	+	-	+	+	-
PAO1-KTN6-LUZ7-24-K	+	-	+	+	-
PAO1-KTN6-LUZ7-72-B	+	-	+	+	-
PAO1-KTN6-phiKZ-72-I	+	-	+	+	-
PAO1-KTN6-phiKZ-72-J	+	-	+	+	-
PAO1-KTN6-KTN4-72-G	+	-	+	+	-
PAO1-KTN6-KTN4-48-M	+	-	+	+	-
PAO1-KTN6-KTN4-72-O	+	-	+	+	-
PAO1-KTN6-KTN4-48-L	+	+	+	-	-
PAO1-KTN6-KTN4-24-D	+	+	+	-	-
PAO1-KTN6-KTN4-48-A	+	+	+	-	-
PAO1-KTN6-KTN4-48-F	+	+	+	-	-
PAO1-KTN6-LUZ7-48-F	+	-	+	-	-
PAO1-KTN6-phiKZ-72-H	+	-	+	-	-
PAO1-KTN6-phiKZ-24-I	+	-	+	-	-
PAO1-KTN6-phiKZ-72-B	+	-	+	-	-
PAO1-KTN6-phiKZ-48-I	+	-	+	-	-
PAO1-KTN6-KTN4-24-G	+	-	+	-	-
PAO1-KTN6-KTN4-48-D	+	-	+	-	-
PAO1-KTN6-KTN4-48-I	+	-	+	-	-
PAO1-KTN6-KTN4-24-M	+	-	-	+	-
PAO1-KTN6-phiKZ-72-K	+	+	-	-	-
PAO1-KTN6-phiKZ-72-E	+	+	-	-	-
PAO1-KTN6-phiKZ-48-L	+	+	-	-	-
PAO1-KTN6-KTN4-48-O	+	+	-	-	-
PAO1-KTN6-KTN4-24-L	+	+	-	-	-
PAO1-KTN6-KTN4-72-E	+	+	-	-	-
PAO1-KTN6-KTN4-24-B	+	+	-	-	-
PAO1-LUZ7-KTN4-48-J	-	+	-	-	-
PAO1-KTN6-LUZ7-48-C	-	-	+	-	-
PAO1-KTN6-phiKZ-48-G	-	-	+	-	-
PAO1-KTN6-KTN4-24-C	-	-	+	-	-
PAO1-KTN6-KTN4-24-N	-	-	+	-	-
PAO1-KTN6-KTN4-24-O	-	-	+	-	-
PAO1-KTN6-KTN4-48-K	-	-	+	-	-
PAO1-KTN6-KTN4-48-P	-	-	+	-	-
PAO1-KTN6-KTN4-72-A	-	-	+	-	-
PAO1-KTN6-KTN4-72-L	-	-	+	-	-
PAO1-KTN6-KTN4-24-H	-	-	-	+	-
PAO1-KTN6-LUZ7-48-A	+	-	-	-	-
PAO1-KTN6-LUZ7-48-D	+	-	-	-	-
PAO1-KTN6-LUZ7-24-H	+	-	-	-	-
PAO1-KTN6-LUZ7-24-B	+	-	-	-	-
PAO1-KTN6-LUZ7-24-C	+	-	-	-	-
PAO1-KTN6-phiKZ-24-C	+	-	-	-	-
PAO1-KTN6-phiKZ-24-J	+	-	-	-	-
PAO1-KTN6-phiKZ-48-B	+	-	-	-	-
PAO1-KTN6-phiKZ-48-A	+	-	-	-	-
PAO1-KTN6-phiKZ-48-C	+	-	-	-	-
PAO1-KTN6-phiKZ-48-H	+	-	-	-	-
PAO1-KTN6-phiKZ-48-J	+	-	-	-	-
PAO1-KTN6-phiKZ-48-D	+	-	-	-	-
PAO1-KTN6-phiKZ-72-F	+	-	-	-	-
PAO1-KTN6-phiKZ-72-G	+	-	-	-	-
PAO1-KTN6-phiKZ-24-D	+	-	-	-	-
PAO1-KTN6-phiKZ-24-E	+	-	-	-	-
PAO1-KTN6-KTN4-72-H	+	-	-	-	-
PAO1-KTN6-KTN4-48-E	+	-	-	-	-
PAO1-KTN6-KTN4-48-J	+	-	-	-	-
PAO1-KTN6-LUZ7-24-G	-	-	-	-	-
PAO1-KTN6-LUZ7-48-E	-	-	-	-	-
PAO1-KTN6-LUZ7-72-C	-	-	-	-	-
PAO1-KTN6-LUZ7-72-D	-	-	-	-	-
PAO1-KTN6-LUZ7-72-G	-	-	-	-	-
PAO1-KTN6-LUZ7-24-J	-	-	-	-	-
PAO1-KTN6-LUZ7-24-E	-	-	-	-	-
PAO1-KTN6-LUZ7-48-B	-	-	-	-	-
PAO1-KTN6-LUZ7-72-J	-	-	-	-	-
PAO1-KTN6-LUZ7-72-K	-	-	-	-	-
PAO1-KTN6-LUZ7-72-L	-	-	-	-	-
PAO1-KTN6-LUZ7-72-E	-	-	-	-	-
PAO1-KTN6-LUZ7-72-F	-	-	-	-	-
PAO1-KTN6-LUZ7-72-H	-	-	-	-	-
PAO1-KTN6-phiKZ-24-H	-	-	-	-	-
PAO1-KTN6-phiKZ-72-C	-	-	-	-	-
PAO1-KTN6-phiKZ-72-D	-	-	-	-	-
PAO1-KTN6-phiKZ-24-B	-	-	-	-	-
PAO1-KTN6-phiKZ-24-G	-	-	-	-	-
PAO1-KTN6-KTN4-24-P	-	-	-	-	-
PAO1-KTN6-KTN4-24-E	-	-	-	-	-
PAO1-KTN6-KTN4-48-N	-	-	-	-	-
PAO1-KTN6-KTN4-72-B	-	-	-	-	-
PAO1-KTN6-KTN4-72-C	-	-	-	-	-
PAO1-KTN6-KTN4-72-D	-	-	-	-	-
PAO1-KTN6-KTN4-72-I	-	-	-	-	-
PAO1-KTN6-KTN4-48-C	-	-	-	-	-

## Sheet: Treated with 3 phage cocktails
	Phage susceptibility patterns						+	susceptibility to phage
Name	LUZ7	KTN6-KT28	LUZ19	phiKZ-KTN4	PA5oct		-	resistance to phage
PAO1-KTN6-LUZ7-phiKZ-72-G	+	+	+	+	+
PAO1-KTN6-LUZ7-phiKZ-24-E	+	+	+	+	+
PAO1-KTN6-LUZ7-KTN4-24-I	+	+	+	+	+
PAO1-KTN6-LUZ7-KTN4-24-L	+	+	+	+	+
PAO1-KTN6-LUZ7-KTN4-72-M	+	+	+	+	+
PAO1-KTN6-LUZ7-KTN4-24-N	+	+	+	+	+
PAO1-KTN6-LUZ7-KTN4-72-N	+	+	+	+	+
PAO1-KTN6-LUZ7-KTN4-48-I	+	+	+	-	+
PAO1-KTN6-LUZ7-KTN4-48-J	+	+	+	-	+
PAO1-KTN6-LUZ7-KTN4-24-E	+	+	+	-	+
PAO1-KTN6-LUZ7-KTN4-24-M	+	+	+	-	+
PAO1-KTN6-LUZ7-phiKZ-72-E	+	-	+	+	+
PAO1-KTN6-LUZ7-phiKZ-48-B	+	-	+	+	+
PAO1-KTN6-LUZ7-phiKZ-48-C	+	-	+	+	+
PAO1-KTN6-LUZ7-phiKZ-48-D	+	-	+	+	+
PAO1-KTN6-LUZ7-phiKZ-72-A	-	-	+	+	+
PAO1-KTN6-LUZ7-phiKZ-72-B	-	-	+	+	+
PAO1-KTN6-LUZ7-KTN4-72-J	+	-	+	+	-
PAO1-KTN6-LUZ7-KTN4-48-C	+	-	+	+	-
PAO1-KTN6-LUZ7-KTN4-72-E	+	-	+	+	-
PAO1-KTN6-LUZ7-KTN4-72-I	+	-	+	+	-
PAO1-KTN6-LUZ7-KTN4-48-C	+	-	+	+	-
PAO1-KTN6-LUZ7-KTN4-48-H	+	-	+	+	-
PAO1-KTN6-LUZ7-KTN4-24-F	+	-	+	+	-
PAO1-KTN6-LUZ7-KTN4-24-G	+	-	+	+	-
PAO1-KTN6-LUZ7-KTN4-72-K	+	-	+	+	-
PAO1-KTN6-LUZ7-KTN4-48-D	+	-	+	-	-
PAO1-KTN6-LUZ7-KTN4-48-E	+	-	+	-	-
PAO1-KTN6-LUZ7-KTN4-24-J	+	-	+	-	-
PAO1-KTN6-LUZ7-KTN4-48-K	+	-	+	-	-
PAO1-KTN6-LUZ7-KTN4-48-L	+	-	+	-	-
PAO1-KTN6-LUZ7-KTN4-48-M	+	-	+	-	-
PAO1-KTN6-LUZ7-KTN4-48-F	+	-	+	-	-
PAO1-KTN6-LUZ7-KTN4-48-N	+	-	+	-	-
PAO1-KTN6-LUZ7-KTN4-24-O	+	-	+	-	-
PAO1-KTN6-LUZ7-KTN4-24-P	+	-	+	-	-
PAO1-KTN6-LUZ7-KTN4-24-B	+	-	+	-	-
PAO1-KTN6-LUZ7-KTN4-24-C	+	-	+	-	-
PAO1-KTN6-LUZ7-KTN4-72-F	+	-	+	-	-
PAO1-KTN6-LUZ7-KTN4-72-H	+	-	+	-	-
PAO1-KTN6-LUZ7-KTN4-72-O	+	-	+	-	-
PAO1-KTN6-LUZ7-KTN4-72-P	+	-	+	-	-
PAO1-KTN6-LUZ7-KTN4-48-P	+	-	+	-	-
PAO1-KTN6-LUZ7-phiKZ-72-I	-	-	+	+	-
PAO1-KTN6-LUZ7-KTN4-24-A	+	+	-	-	+
PAO1-KTN6-LUZ7-KTN4-72-C	+	+	-	-	+
PAO1-KTN6-LUZ7-KTN4-48-O	+	+	+	-	-
PAO1-KTN6-LUZ7-KTN4-72-A	+	+	+	-	-
PAO1-KTN6-LUZ7-KTN4-24-I	+	+	-	-	-
PAO1-KTN6-LUZ7-phiKZ-24-K	+	+	-	-	-
PAO1-KTN6-LUZ7-phiKZ-24-L	+	-	-	-	-
PAO1-KTN6-LUZ7-phiKZ-24-A	+	-	-	-	-
PAO1-KTN6-LUZ7-KTN4-48-I	+	-	-	-	-
PAO1-KTN6-LUZ7-KTN4-24-D	+	-	-	-	-
PAO1-KTN6-LUZ7-KTN4-24-F	-	-	+	-	-
PAO1-KTN6-LUZ7-phiKZ-24-M	-	-	+	-	-
PAO1-KTN6-LUZ7-phiKZ-24-D	-	-	+	-	-
PAO1-KTN6-LUZ7-phiKZ-24-H	-	-	+	-	-
PAO1-KTN6-LUZ7-phiKZ-24-J	-	-	+	-	-
PAO1-KTN6-LUZ7-phiKZ-48-G	-	-	+	-	-
PAO1-KTN6-LUZ7-KTN4-48-G	-	-	+	-	-
PAO1-KTN6-LUZ7-KTN4-72-B	-	-	+	-	-
PAO1-KTN6-LUZ7-KTN4-24-H	-	-	-	+	-
PAO1-KTN6-LUZ7-phiKZ-72-C	-	-	-	-	-
PAO1-KTN6-LUZ7-phiKZ-24-B	-	-	-	-	-
PAO1-KTN6-LUZ7-phiKZ-72-D	-	-	-	-	-
PAO1-KTN6-LUZ7-phiKZ-72-F	-	-	-	-	-
PAO1-KTN6-LUZ7-phiKZ-24-I	-	-	-	-	-
PAO1-KTN6-LUZ7-phiKZ-48-E	-	-	-	-	-
PAO1-KTN6-LUZ7-phiKZ-48-F	-	-	-	-	-
PAO1-KTN6-LUZ7-phiKZ-72-J	-	-	-	-	-
PAO1-KTN6-LUZ7-phiKZ-48-A	-	-	-	-	-
PAO1-KTN6-LUZ7-phiKZ-24-G	-	-	-	-	-
PAO1-KTN6-LUZ7-phiKZ-72-L	-	-	-	-	-
PAO1-KTN6-LUZ7-KTN4-24-I	-	-	-	-	-
PAO1-KTN6-LUZ7-KTN4-48-GI	-	-	-	-	-
PAO1-KTN6-LUZ7-phiKZ-72-K	-	-	-	-	-
PAO1-KTN6-LUZ7-phiKZ-24-C	-	-	-	-	-
PAO1-KTN6-LUZ7-phiKZ-24-F	-	-	-	-	-
PAO1-KTN6-LUZ7-KTN4-24-D	-	-	-	-	-
PAO1-KTN6-LUZ7-KTN4-72-D	-	-	-	-	-
PAO1-KTN6-LUZ7-KTN4-72-L	-	-	-	-	-
PAO1-KTN6-LUZ7-KTN4-24-K	-	-	-	-	-
PAO1-KTN6-LUZ7-KTN4-48-A	-	-	-	-	-
PAO1-KTN6-LUZ7-KTN4-48-B	-	-	-	-	-
