# Supplementary material for: Emerging Phage Resistance in Pseudomonas aeruginosa PAO1 Is Accompanied by an Enhanced Heterogeneity and Reduced Virulence
Source: Viruses. 2021 Jul 10;13(7):1332. doi: 10.3390/v13071332 (PMC8310095; doi:10.3390/v13071332)
Supplement: Supplementary file 1 [file viruses-13-01332-s001.zip › Table S2 clones characteristics.xlsx]

## Sheet: Arkusz2 (2)
Table S2. Characteristics of P. aeruginosa PAO1 control and phage-resistant isolates. Statistical analysis was made by the ANOVA test (denoted P-values < 0.001). White boxes – no changes; blue boxes – a significant increase; grey boxes – a significant decrease.
		Phage susceptibility patterns					Biofilm formation	Motility properties			Extracellular virulence factors production			Colony morphology	Drug susceptibility [MIC mg/l]					Susceptibility to 50% sheep blood serum	LPS patterns	Apoptotic activity of LPS	G. mellonella infection model
Number	Clone names	LUZ7	KTN6/KT28	LUZ19	ΦKZ/KTN4	PA5oct	OD λ = 560nm	Swarming [mm]	Swimming [mm]	Twitching [mm]	Elastase (λ = 495nm)	Piocyanine (λ = 686nm)	Pyovidine (EX λ = 395nm, EM λ = 460nm)	Visual evaluation	Gentamicin	Piperacillin	Ceftazidime	Ciprofloxacin	Imipenem	CFU/ml log change		P-values < 0.05	P-values < 0.05
1	PAO1						0.58675	5.8	32	21.8	0.505	0.219663	1896.01	Normal	2	2	1.5	0.19	1.5	+1	Smooth
2	PAO1-K-24-A						0.387332	5.8	31	25	0.35475	0.44502	1904.78	Normal	2	2	1.5	0.19	1.5	+1	Smooth	Yes
3	PAO1-K-48-A						0.35	6.8	31.8	20.2	0.4955	0.171375	1775.74	Normal	2	2	1.5	0.19	1.5	+1	Smooth	Yes
4	PAO1-K-72-A						1.74533	6.8	31.8	22.2	0.2305	0.08452	2574.44	Normal	2	2	1.5	0.19	1.5	+1	Smooth
5	PAO1-LUZ7-48-B	-					0.7445	7.8	33.8	16.8	0.08725	0.11121	2991.34	Normal	1.5	2	1	0.125	1.5	+1	Smooth
6	PAO1-LUZ7-48-K	-	-	-	-	-	0.47325	4	27	4	0.1225	0.08848	2115.98	Mucoid	1.5	4	1	0.125	2	0	Smooth	Yes
7	PAO1-KTN6-48-J					-	1.14867	5.8	35	16.8	0.088	0.145745	3389.04	Normal	3	2	1.5	0.19	1.5	-1	SR	Yes	reduced virulence
8	PAO1-KTN6-24-D		-				0.35	6	25.2	17	0.4435	0.165038	2925.95	Normal	3	2	1.5	0.19	1	-1	Rough	Yes
9	PAO1-KTN6-72-J	-	-			-	0.84275	4.8	24	14.2	0.43475	0.18699	2782.22	Normal	3	2	1.5	0.19	1.5	-1	Rough
10	PAO1-LUZ19-24-E	+	+	-			0.30175	6.2	31.8	5	0.0915	0.109042	2918.17	Normal	1.5	2	1.5	0.19	1.5	+1	Smooth
11	PAO1-LUZ19-48-L			-		-	0.54425	5.2	32.8	5.2	0.39875	0.100577	2918.71	Normal	1.5	2	1.5	0.19	1	+1	Smooth
12	PAO1-LUZ19-48-F					-	0.6265	10.8	33.8	19	0.07975	0.114865	2802.57	Normal	1.5	2	1.5	0.19	1	+1	Smooth	Yes
13	PAO1-KTN4-24-B				-	-	0.343	1.8	28.2	5.2	0.375	0.463595	1409.97	Normal	2	4	1.5	0.19	1	0	Smooth		reduced virulence
14	PAO1-KTN4-72-B				-	-	0.756333	2.8	23	7.8	0.42825	0.53367	1594.94	Normal	2	3	1.5	0.19	1	0	Smooth	Yes	reduced virulence
15	PAO1-KTN4-72-I			-	-	-	0.4685	5	27.2	4.8	0.087	0.177262	2216.93	Normal	2	3	2	0.125	1.5	+1	Smooth	Yes
16	PAO1-phiKZ-72-C	-	-		-	-	0.416	4.2	2	5.8	0.10525	0.106012	2224.34	Normal	2	1.5	1.5	0.064	1	+1	Smooth	Yes	reduced virulence
17	PAO1-phiKZ-48-I			-		-	0.576667	3.8	21.2	2	0.3495	0.108055	2896.32	Normal	2	3	1.5	0.094	1	+1	Smooth		reduced virulence
18	PAO1-phiKZ-24-H				-	-	0.984	3.8	24.8	4.2	0.4305	0.153753	3056.16	Normal	1.5	4	1.5	0.094	1.5	+1	Smooth		reduced virulence
19	PAO1-LUZ7-KTN4-48-J	-		-	-	-	0.52925	6.8	29.8	4.8	0.47	0.0716	2759.11	Normal	2	4	1.5	0.19	1.5	+1	Smooth		reduced virulence
20	PAO1-KTN6-KTN4-24-A		-				1.25975	5.8	31.2	16.6	0.3498	0.3445	849.5	Normal	1.5	3	1	0.094	0.75	0	Rough		reduced virulence
21	PAO1-KT28-phiKZ-72-G		-			-	0.885	5.8	31	11.8	0.458	0.204597	2017.64	Normal	3	2	1.5	0.19	1.5	0	Rough		reduced virulence
22	PAO1-KT28-phiKZ-72-E	-	-				0.989	6	30.2	19.2	0.41175	0.198572	2158.16	Normal	2	2	1.5	0.19	1	-1	Rough	Yes	reduced virulence
23	PAO1-KTN6-LUZ7-48-H	-	-				0.74	8	26.8	6.8	0.38025	0.0565575	1037.1	Normal	3	4	1	0.094	1.5	-1	Rough
24	PAO1-LUZ7-KTN4-72-A	-		-	-		0.4595	4.2	15.4	13.4	0.2568	0.088	892	Normal	1.5	1.5	1	0.064	1.5	+1	Smooth		reduced virulence
25	PAO1-KTN6-phiKZ-48-L			-	-	-	0.895	5.8	34.8	5	0.38825	0.0828125	3033.3	Normal	2	3	1.5	0.125	2	+1	Smooth
26	PAO1-KTN6-phiKZ-48-B		-	-	-	-	1.93675	2.8	21	4.8	0.1355	0.07837	2649.11	Normal	3	6	2	0.094	2	-4	Rough		reduced virulence
27	PAO1-KTN6-KTN4-24-H	-	-	-	-		0.07025	4.4	27.2	19.4	0.3288	0.0905	1012.5	Brown Pigment	0.25	3	1.5	0.094	1	-2	Rough		reduced virulence
28	PAO1-KTN6-phiKZ-48-G	-	-		-	-	0.0045	3.2	25.2	5.4	0.08575	0.051195	484.571	Brown Pigment	0.19	4	3	0.064	0.75	-3	Rough		reduced virulence
29	PAO1-KTN6-phiKZ-48-J		-	-	-	-	0.04	3.2	23.8	5	0.0865	0.0716325	728.239	Brown Pigment	0.125	6	2	0.064	0.75	-3	Rough		reduced virulence
30	PAO1-KTN6-phiKZ-24-H	-	-	-	-	-	0.711082	3.2	25.8	5.8	0.0845	0.134825	1484.39	Mucoid, Gray Pigment	1.5	3	1	0.094	2	+1	Smooth		reduced virulence
31	PAO1-KTN6-LUZ7-KTN4-24-A			-	-		0.27675	5.2	23	14	0.3166	0.04475	168	Normal	1	1	2	0.064	1.5	+1	Smooth		reduced virulence
32	PAO1-KTN6-LUZ7-KTN4-48-C		-			-	0.749	1.4	10	4.8	0.0764	0.22075	73.55	Brown Pigment	0.19	1.5	1.5	0.064	0.75	-2	Rough		reduced virulence
33	PAO1-KTN6-LUZ7-KTN4-24-I			-	-	-	0.0058125	1.8	22	4.8	0.08425	0.0579675	422.176	Normal	0.25	6	2	0.064	1.5	+1	Smooth		reduced virulence
34	PAO1-KTN6-LUZ7-KTN4-48-I		-	-	-	-	1.54275	2	16.8	5	0.12075	0.10307	2036.14	Normal	3	8	3	0.125	1	0	Rough		reduced virulence
35	PAO1-KTN6-LUZ7-KTN4-24-F	-	-		-	-	1.06275	4	19.2	4.2	0.1025	0.0802825	1804.25	Normal	3	6	3	0.19	0.75	0	SR		reduced virulence
36	PAO1-KTN6-LUZ7-KTN4-48-GI	-	-	-	-	-	0.00425	2.8	3	4	0.09575	0.046475	107.635	Brown Pigment	0.19	3	1.5	0.094	0.19	-2	Rough		reduced virulence
37	PAO1-KTN6-LUZ7-KTN4-24-D	-	-	-	-	-	0.205833	3.2	15.2	4.8	0.098	0.06281	623.41	Normal	4	4	2	0.125	1	-2	SR		reduced virulence
38	PAO1-KTN6-LUZ7-phiKZ-48-D		-				0.5805	7.8	22.2	12.2	0.08275	0.0583825	1098.43	Normal	2	3	1.5	0.064	1	-1	Rough		reduced virulence
39	PAO1-KTN6-LUZ7-phiKZ-24-L		-	-	-	-	0.769	2.8	20.2	5	0.089	0.056735	759.241	Normal	1.5	3	1.5	0.094	1	-1	Smooth		reduced virulence
40	PAO1-KTN6-LUZ7-phiKZ-24-B	-	-	-	-	-	0.0035	3	23.8	6	0.08175	0.0655775	392.457	Brown Pigment	0.19	6	3	0.064	0.75	-2	Rough		reduced virulence
41	PAO1-KTN6-LUZ7-phiKZ-48-F	-	-	-	-	-	0.0054375	1.8	1.8	4	0.08975	0.0450575	104.265	Brown Pigment	0.19	1	0.75	0.032	0.012	-4	Rough		reduced virulence
42	PAO1-KTN6-LUZ7-phiKZ-24-G	-	-	-	-	-	0.0034375	3.4	2	5.8	0.0885	0.0502475	1198.86	Mucoid, Gray Pigment	1.5	0.38	0.38	0.032	0.19	0	Smooth		reduced virulence
